# Supplementary material for: Molecular Engineering of Curcumin, an Active Constituent of Curcuma longa L. (Turmeric) of the Family Zingiberaceae with Improved Antiproliferative Activity
Source: MDPI journal article supplement (doi:10.3390/plants10081559), 2021-07-29
Supplement: s1 [file s1]

# Molecular Engineering of Curcumin, an Active Constituent of *Curcuma longa* L. (Turmeric) of the Family *Zingiberaceae* with Improved Antiproliferative Activity

Amena Ali <sup>1,\*†</sup>, Abuzer Ali <sup>2,†</sup>, Abu Tahir <sup>3</sup>, Md. Afroz Bakht <sup>4</sup>, Salahuddin <sup>5</sup> and Mohamed Jawed Ahsan <sup>6,\*</sup>

<sup>1</sup> Department of Pharmaceutical Chemistry, College of Pharmacy, Taif University, P.O. Box 11099, Taif 21944, Saudi Arabia

<sup>2</sup> Department of Pharmacognosy, College of Pharmacy, Taif University, P.O. Box 11099, Taif 21944, Saudi Arabia; abuali@tu.edu.sa

<sup>3</sup> Department of Pharmacology, Raghukul College of Pharmacy, Bhopal, Madhya Pradesh 462 003, India; aliabutahir2009@gmail.com

<sup>4</sup> Department of Chemistry, College of Science and Humanity Studies, Prince Sattam Bin Abdulaziz University, P.O. Box 83, Al-Kharj 11942, Saudi Arabia; bakhtpharm@gmail.com

<sup>5</sup> Department of Chemistry, Noida Institute of Technology (Pharmacy Institute), Knowledge Park-2, Greater Noida, Uttar Pradesh 201 306, India; sallu\_05@yahoo.co.in

<sup>6</sup> Department of Pharmaceutical Chemistry, Maharishi Arvind College of Pharmacy, Ambabari Circle, Jaipur, Rajasthan 302 039, India

\* Correspondence: amrathore@tu.edu.sa (A.A.); jawedpharma@gmail.com (M.J.A.)

† Authors contributed equally.

## Supplementary Information

### Antiproliferative activity

The anticancer screening was carried out as per the NCI US protocol [1-5]. Using the seven absorbance measurements (time zero, ( $T_i$ ), control growth, ( $C$ ), and test growth in the presence of drug at the five concentration levels ( $T_f$ )), the percentage growth was calculated at each of the drug concentrations level as  $[(\frac{T_f - T_i}{C - T_i}) \times 100]$  for concentrations for which  $T_f \geq T_i$ , and  $\frac{T_f - T_i}{T_i} \times 100$  for concentrations for which  $T_f < T_i$ .

Three-dose response parameters ( $GI_{50}$ , TGI, and  $LC_{50}$ ) were calculated for each of the experimental agents. Growth inhibition of 50% ( $GI_{50}$ ) was calculated from  $100 \times \frac{T_f - T_i}{C - T_i} = 50$ , , which was the drug concentration resulting in a 50% reduction in the net protein increase (as measured by sulforhodamine B, SRB staining) in control cells during the drug incubation. The total growth inhibition (TGI) was calculated from  $T_f = T_i$ , which was the drug concentration resulting in total growth inhibition and signified the cytostatic effect. The  $LC_{50}$  was calculated from  $100 \times \frac{T_f - T_i}{C - T_i} = -50$ , , indicating a net loss of cells following treatment which indicated the concentration of drug resulting in a 50% reduction in the measured protein at the end of the drug treatment as compared to that at the beginning.

## References

1. DTP Developmental therapeutic Programs: <http://dtp.nci.nih.gov>
2. Monks, A.; Scudiero, D.; Skehan, P.; Shoemaker, R.; Paull, K.; Vistica, D.; Hose, C.; Langley, J.; Cronise, P.; Vaigro-Wolff, A.; Gray-Goodrich, M.; Campbell, H.; Mayo, J.; Boyd, M. Feasibility of a highflux anticancer drug screening using a diverse panel of cultured human tumor cell lines. *J. Nat. Cancer Inst.* 1991, 83 757-766. <https://doi.org/10.1093/jnci/83.11.757>
3. Boyd, M.R.; Paull, K.D. Some practical considerations and applications of the National Cancer Institute in vitro anticancer drug discovery screen. *Drug Dev. Res.* 1995, 34, 91-109. <https://doi.org/10.1002/ddr.430340203>
4. Shoemaker, R.H. The NCI60 human tumour cell line anticancer drug screen. *Nat. Rev. Cancer.* 2006, 6, 813-823. <https://doi.org/10.1038/nrc1951>
5. Grever, M. R.; Schepartz, S. A.; Chabner, B. A. *Sem. Oncol.* 1992, 19, 622-638.

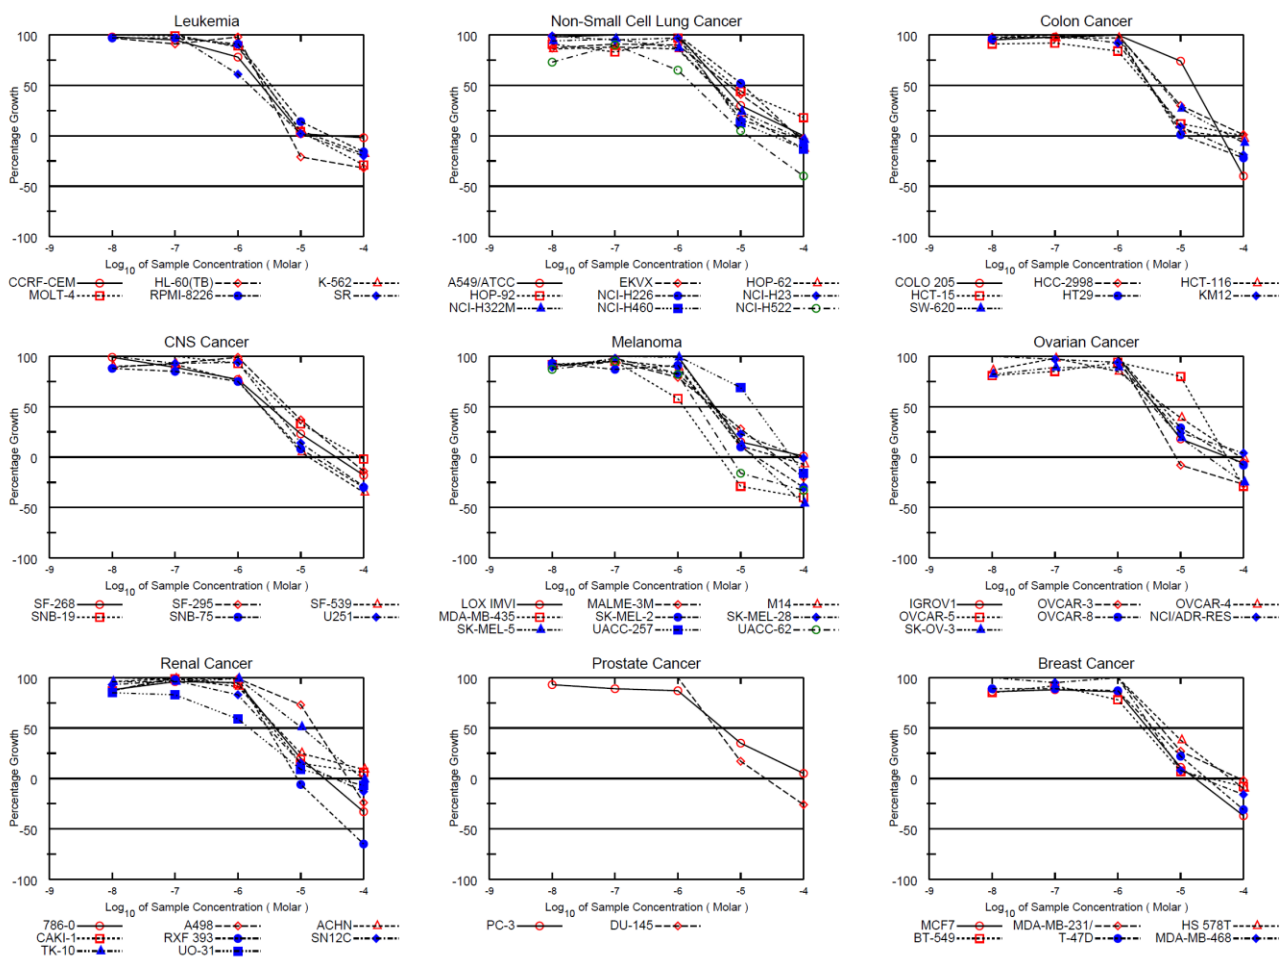

**Figure S1.** Antiproliferative profile of compound **3b** in terms of GP and Log<sub>10</sub> molar concentration in five dose assay.

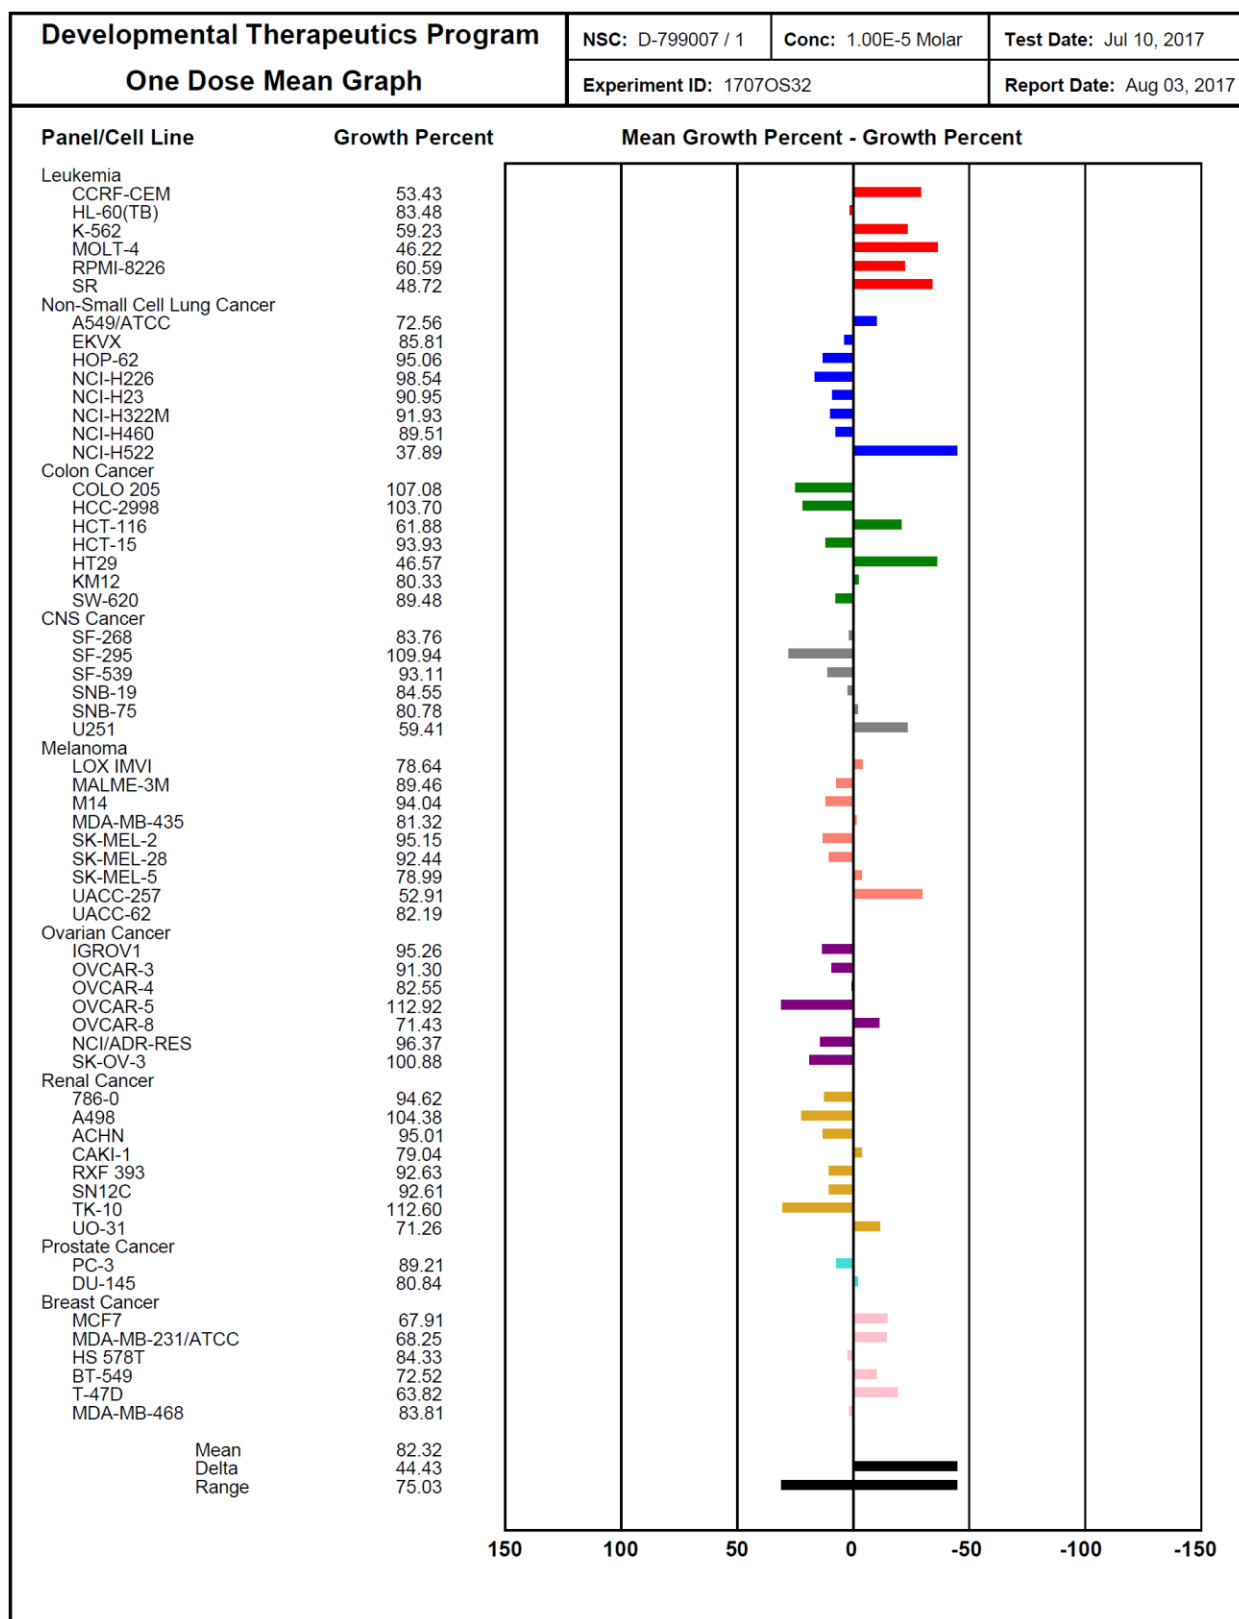

**Figure S2.** 60 NCI cancer cell lines based antiproliferative activity of curcumin analogue **3a** in single dose assay at 10  $\mu$ M.

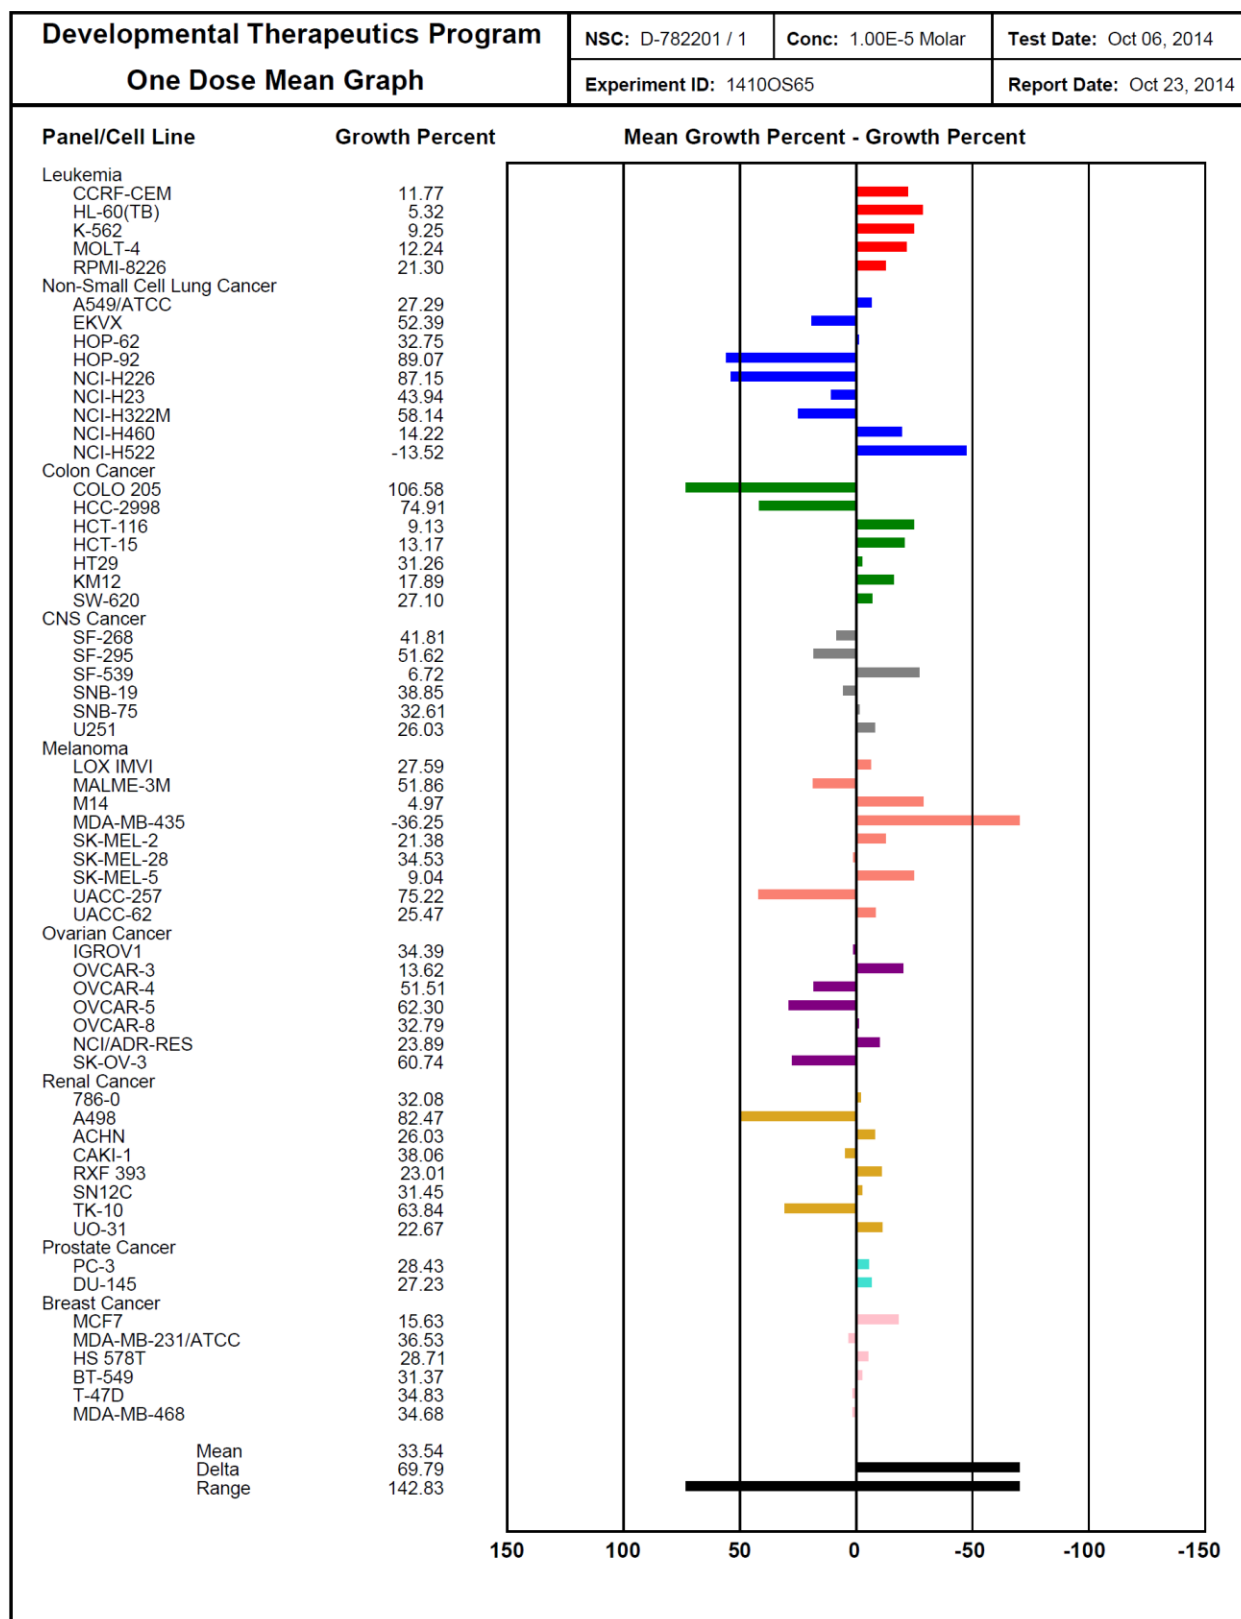

**Figure S3.** 60 NCI cancer cell lines based antiproliferative activity of curcumin analogue **3b** in single dose assay at 10  $\mu$ M.

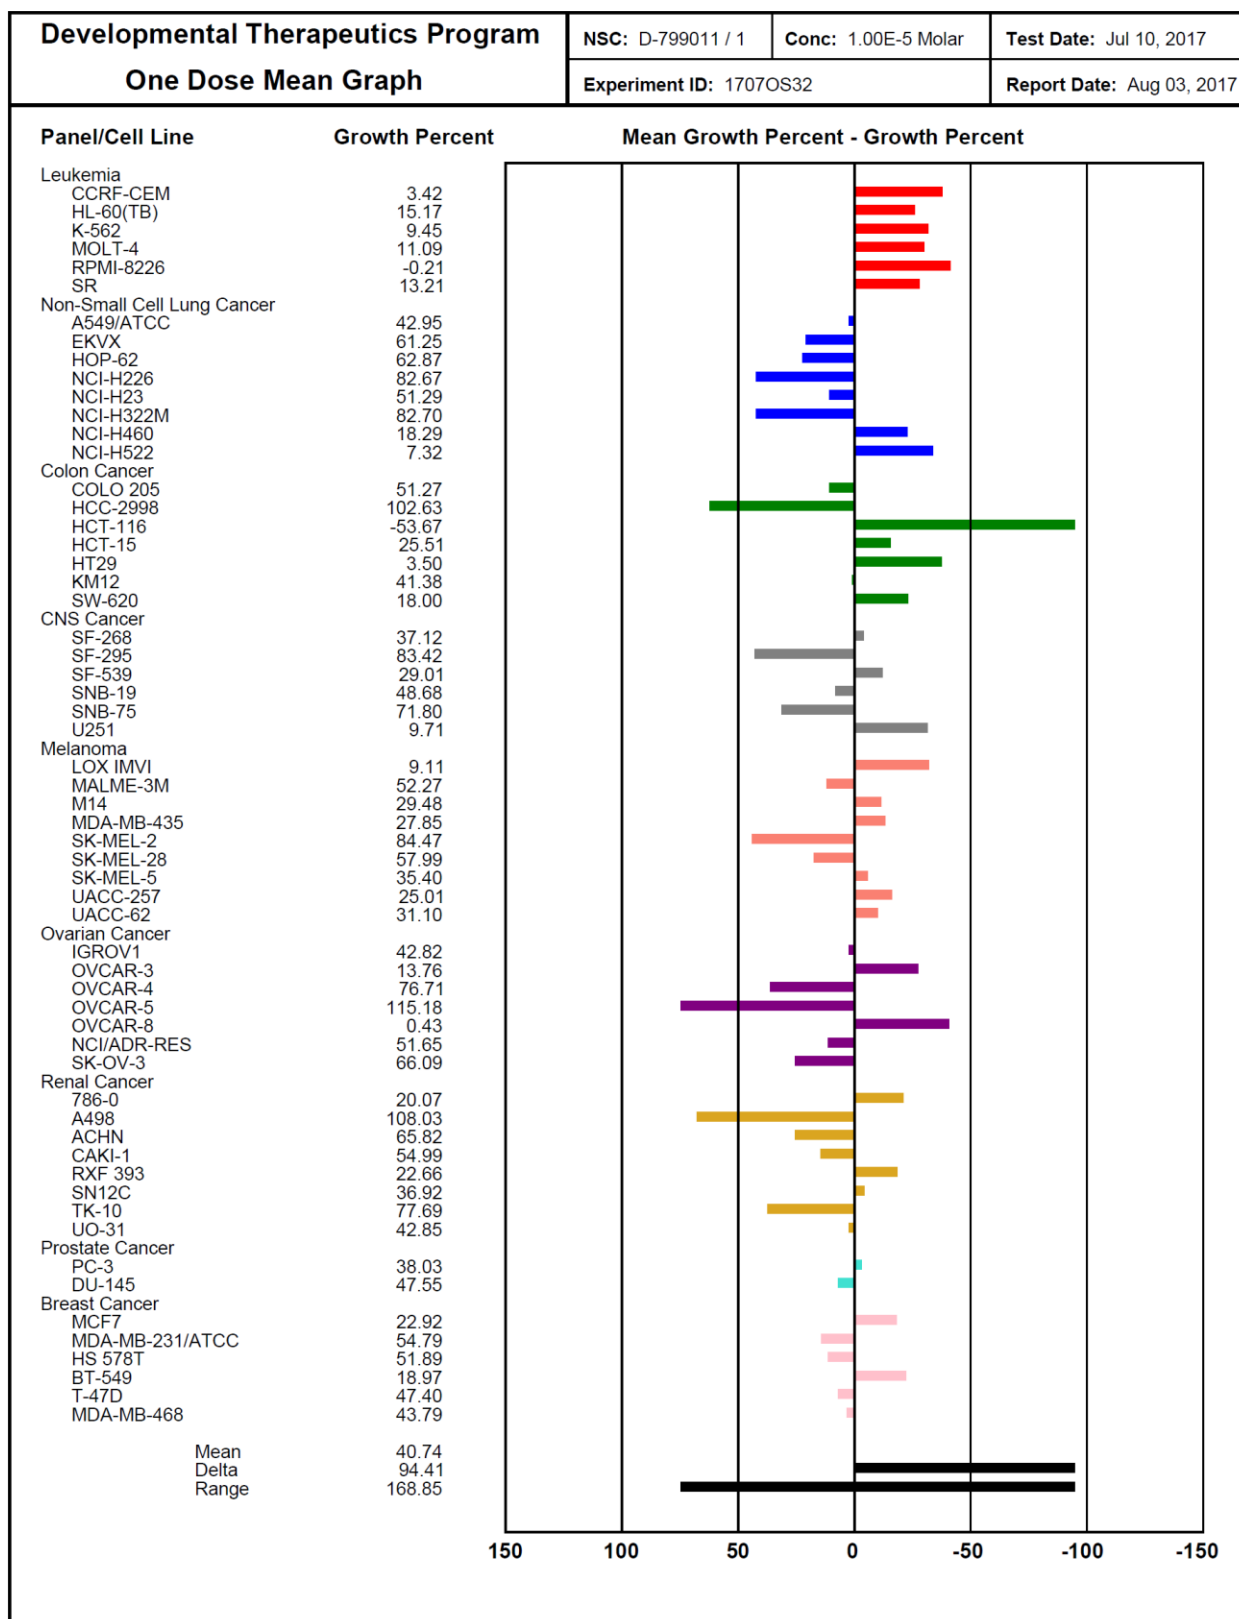

**Figure S4.** 60 NCI cancer cell lines based antiproliferative activity of curcumin analogue **3c** in single dose assay at 10  $\mu$ M.
